# Supplementary material for: Fecal microbiota transplantation from sodium alginate-dosed mice and normal mice mitigates intestinal barrier injury and gut dysbiosis induced by antibiotics and cyclophosphamide
Source: Royal Society of Chemistry journal article supplement (doi:10.1039/d3fo01193c), 2023-01-01
Supplement: d3fo01193c2.pdf [file d3fo01193c2.pdf]

**Figure S1** The relevant phenotypic data of mice. (a) body weight between the AN group and the N group. (b) spleen index between the AN group and the N group. (c) thymus index between the AN group and the N group. (d) Weight changes of mice before and after cyclophosphamide injection in FMT experiment

**Figure S2** Ileum MUC2 positive cells/crypt. Three crypts were randomly selected from each section for counting, and three mice were employed in each group
