# Supplementary figures and images for: Fecal microbiota transplantation from sodium alginate-dosed mice and normal mice mitigates intestinal barrier injury and gut dysbiosis induced by antibiotics and cyclophosphamide
Source: Royal Society of Chemistry journal article supplement (doi:10.1039/d3fo01193c), 2023-01-01

a

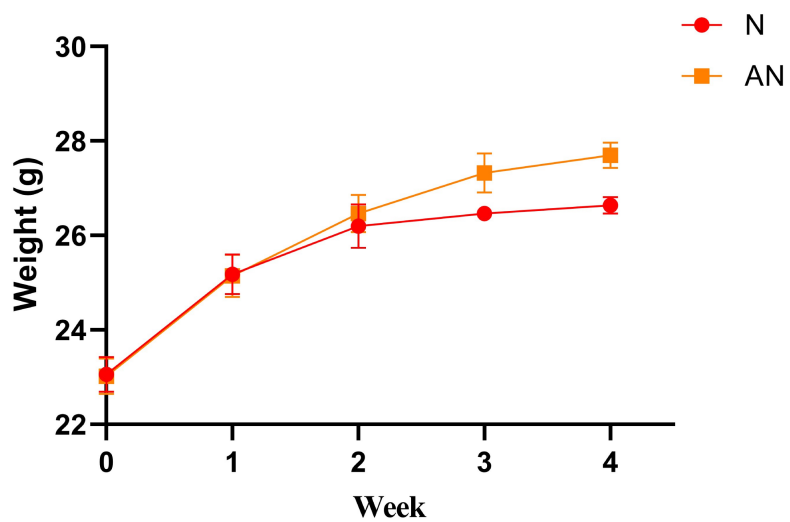

b

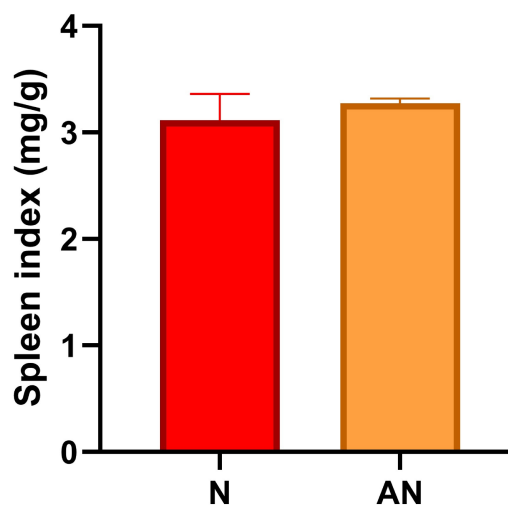

c

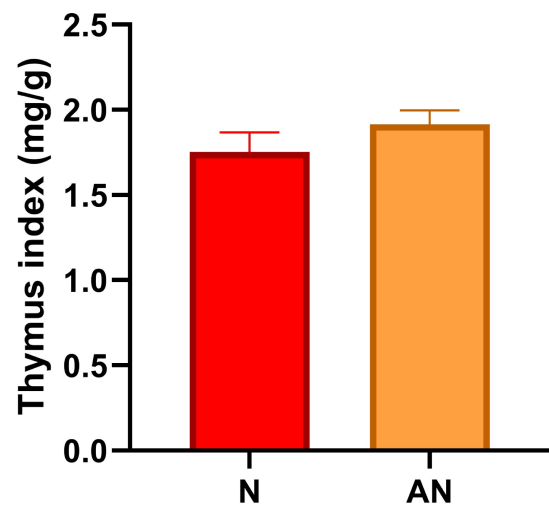

d

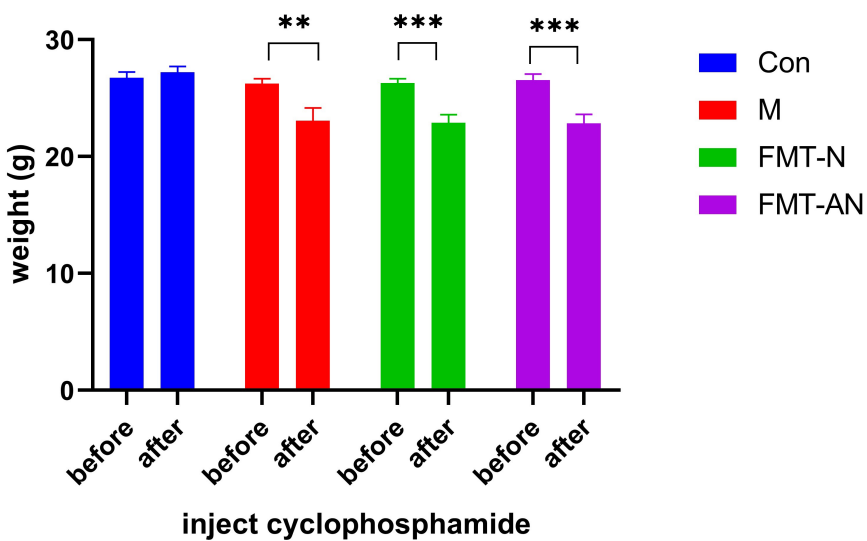

Supplement: d3fo01193c4.pdf [file d3fo01193c4.pdf]

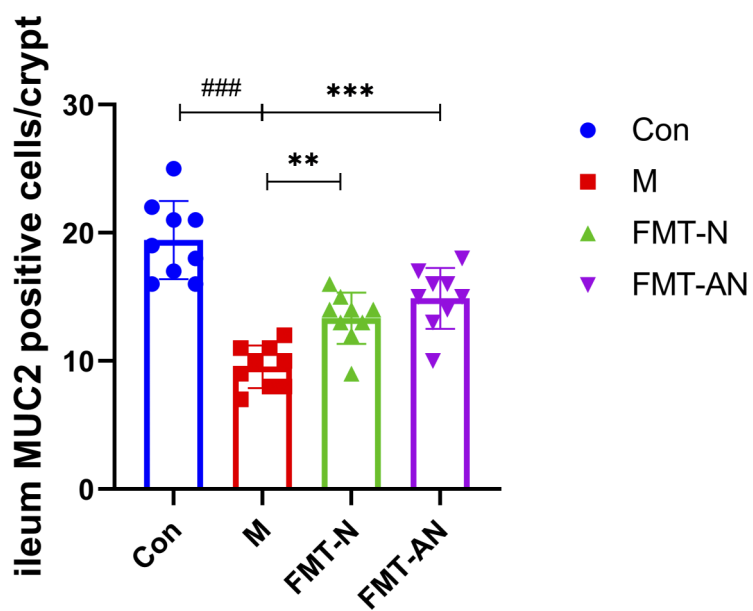

Supplement: d3fo01193c5.pdf [file d3fo01193c5.pdf]

$\beta$ -actin:

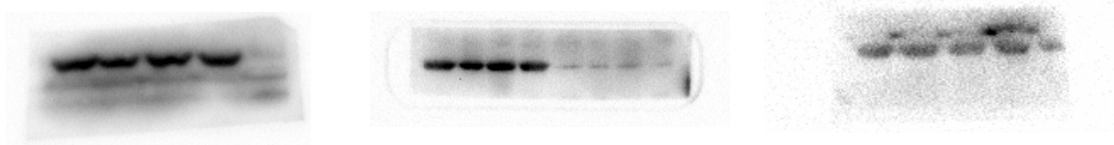

IL-6:

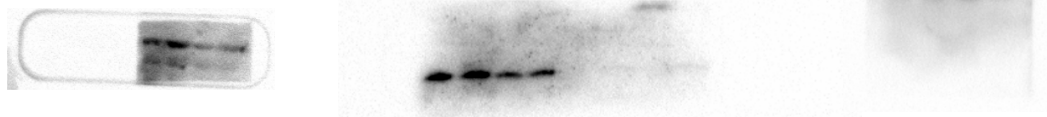

IL-10:

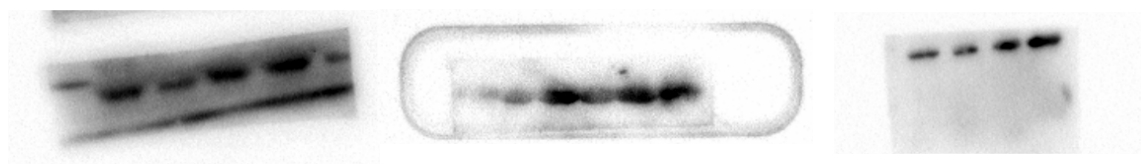

TLR4:

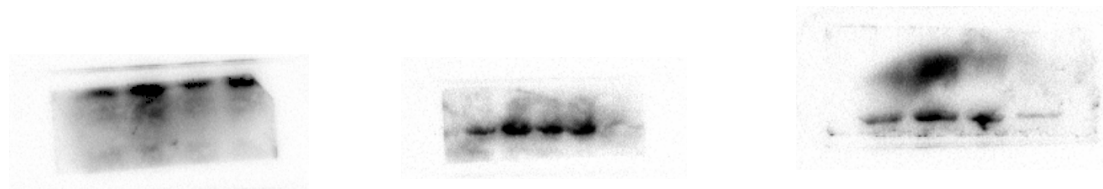

Supplement: d3fo01193c6.pdf [file d3fo01193c6.pdf]
